# Supplementary material for: Digital light processing 3D printing of dynamic magneto-responsive thiol-acrylate composites
Source: Royal Society of Chemistry journal article supplement (doi:10.1039/d3ra02504g), 2023-01-01
Supplement: d3ra02504g1.pdf [file d3ra02504g1.pdf]

## Digital Light Processing 3D Printing of Dynamic Magneto-responsive Thiol-Acrylate Composites

Ines Cazin<sup>1</sup>, Elisabeth Rossegger<sup>1</sup>, Ignazio Roppolo<sup>2</sup>, Marco Sangermano<sup>2</sup>, Petra Granitzer<sup>3</sup>, Klemens Rumpf<sup>3</sup>, Sandra Schlögl<sup>1\*</sup>

1. Polymer Competence Center Leoben GmbH, Roseggerstrasse 12, A-8700 Leoben, Austria
2. Department of Applied Science and Technology, Politecnico di Torino, Duca degli Abruzzi, 24, 10124, Torino, Italy
3. Institute of Physics, Universitätsplatz 3, 8010 Graz, Austria

Email: [sandra.schloegl@pccl.at](mailto:sandra.schloegl@pccl.at)

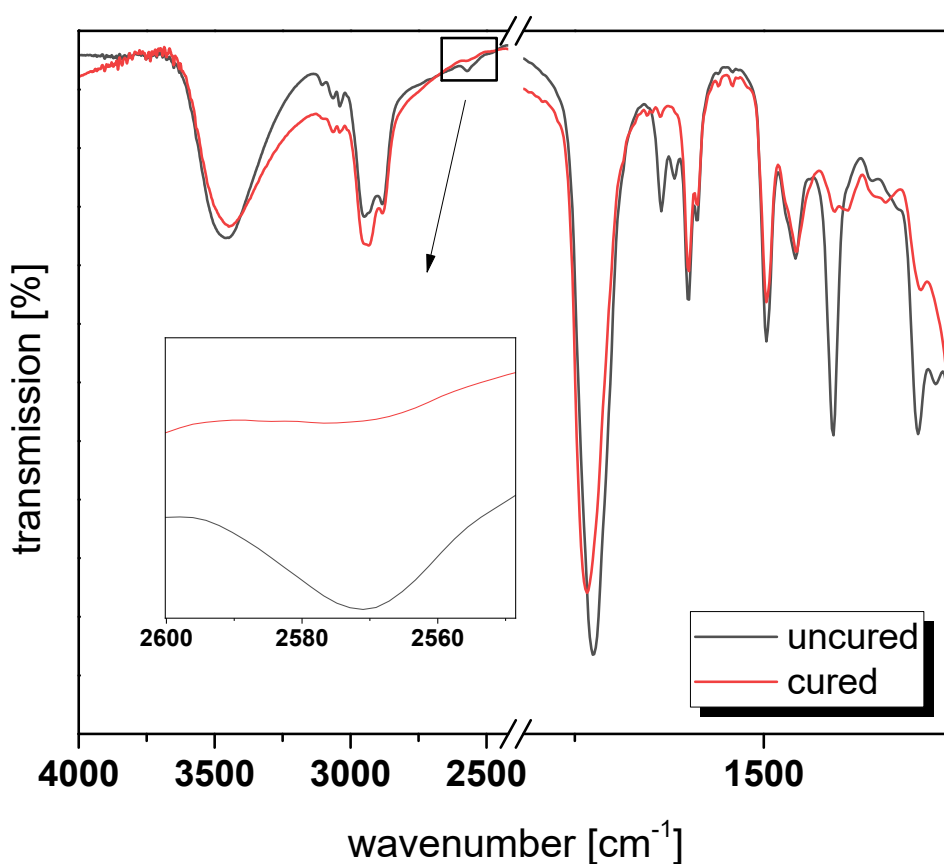

**Figure S1.** FTIR spectrum of resin-2-ONPs prior to and after photocuring.

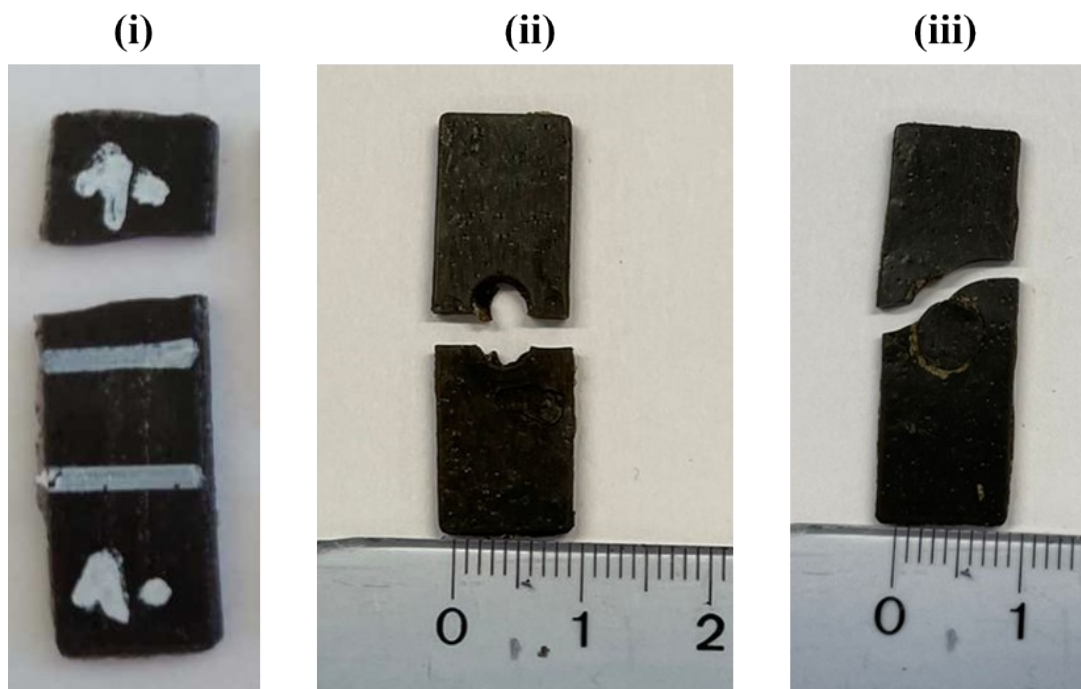

**Figure S2.** DLP printed test specimens containing 4 wt% of  $\text{Fe}_3\text{O}_4$  nanoparticles after tensile testing. (i) DLP printed control sample. (ii) DLP printed test specimen with a circular-shaped hole in the center. (iii) Self-healed tensile specimen.
